# Supplementary material
Source: PubMed Central journal article supplement (PMC2714658)

Table 6. Eyes with five-year follow-up which were gradable for disc change status compared for selected eye and patient characteristics to those ungradable either because stereoscopic photographs were not available or because they were of insufficient quality to judge progression.

| Eye or patient characteristic                  | Gradable disc change status |             | P-value <sup>a</sup> |
|------------------------------------------------|-----------------------------|-------------|----------------------|
|                                                | Yes<br>N=348                | No<br>N=134 |                      |
| N (%) randomized to surgery                    | 163 (47%)                   | 70 (52%)    | 0.31                 |
| N (%) male gender                              | 190 (55%)                   | 75 (56%)    | 0.84                 |
| N (%) black race                               | 132 (38%)                   | 36 (27%)    | 0.025                |
| N (%) with cataract extracted during follow-up | 58 (17%)                    | 34 (25%)    | 0.038                |
| Mean (SD) age at randomization                 | 57.4 (10.7)                 | 61.0 (10.0) | 0.001                |
| Mean ETDRS letters read at baseline            | 86.2 (5.5)                  | 85.5 (5.5)  | 0.24                 |
| Mean (SD) MD at baseline                       | -5.1 (4.0)                  | -5.7 (4.7)  | 0.21                 |
| Mean (SD) IOP (mmHg) at baseline               | 27.6 (5.7)                  | 27.2 (5.1)  | 0.45                 |
| Mean (SD) ETDRS letters read at follow-up      | 83.8 (9.8)                  | 79.6 (12.3) | 0.001                |

|                                   |            |            |       |
|-----------------------------------|------------|------------|-------|
| Mean (SD) MD at follow-up         | -5.1 (5.2) | -6.2 (5.9) | 0.054 |
| Mean (SD) IOP (mmHg) at follow-up | 16.4 (4.7) | 15.4 (3.9) | 0.040 |

<sup>a</sup> Dichotomous variables compared with Fisher's exact test, interval level variables

compared with Student's t-test

Appendix Figure. Glaucomatous progression in a patient in the CIGTS five-year optic disc study with IOP reduction from 33mm Hg to 21 mm Hg 65 months after randomization to medical therapy.

Left: Before therapy

Right: 65 months after therapy

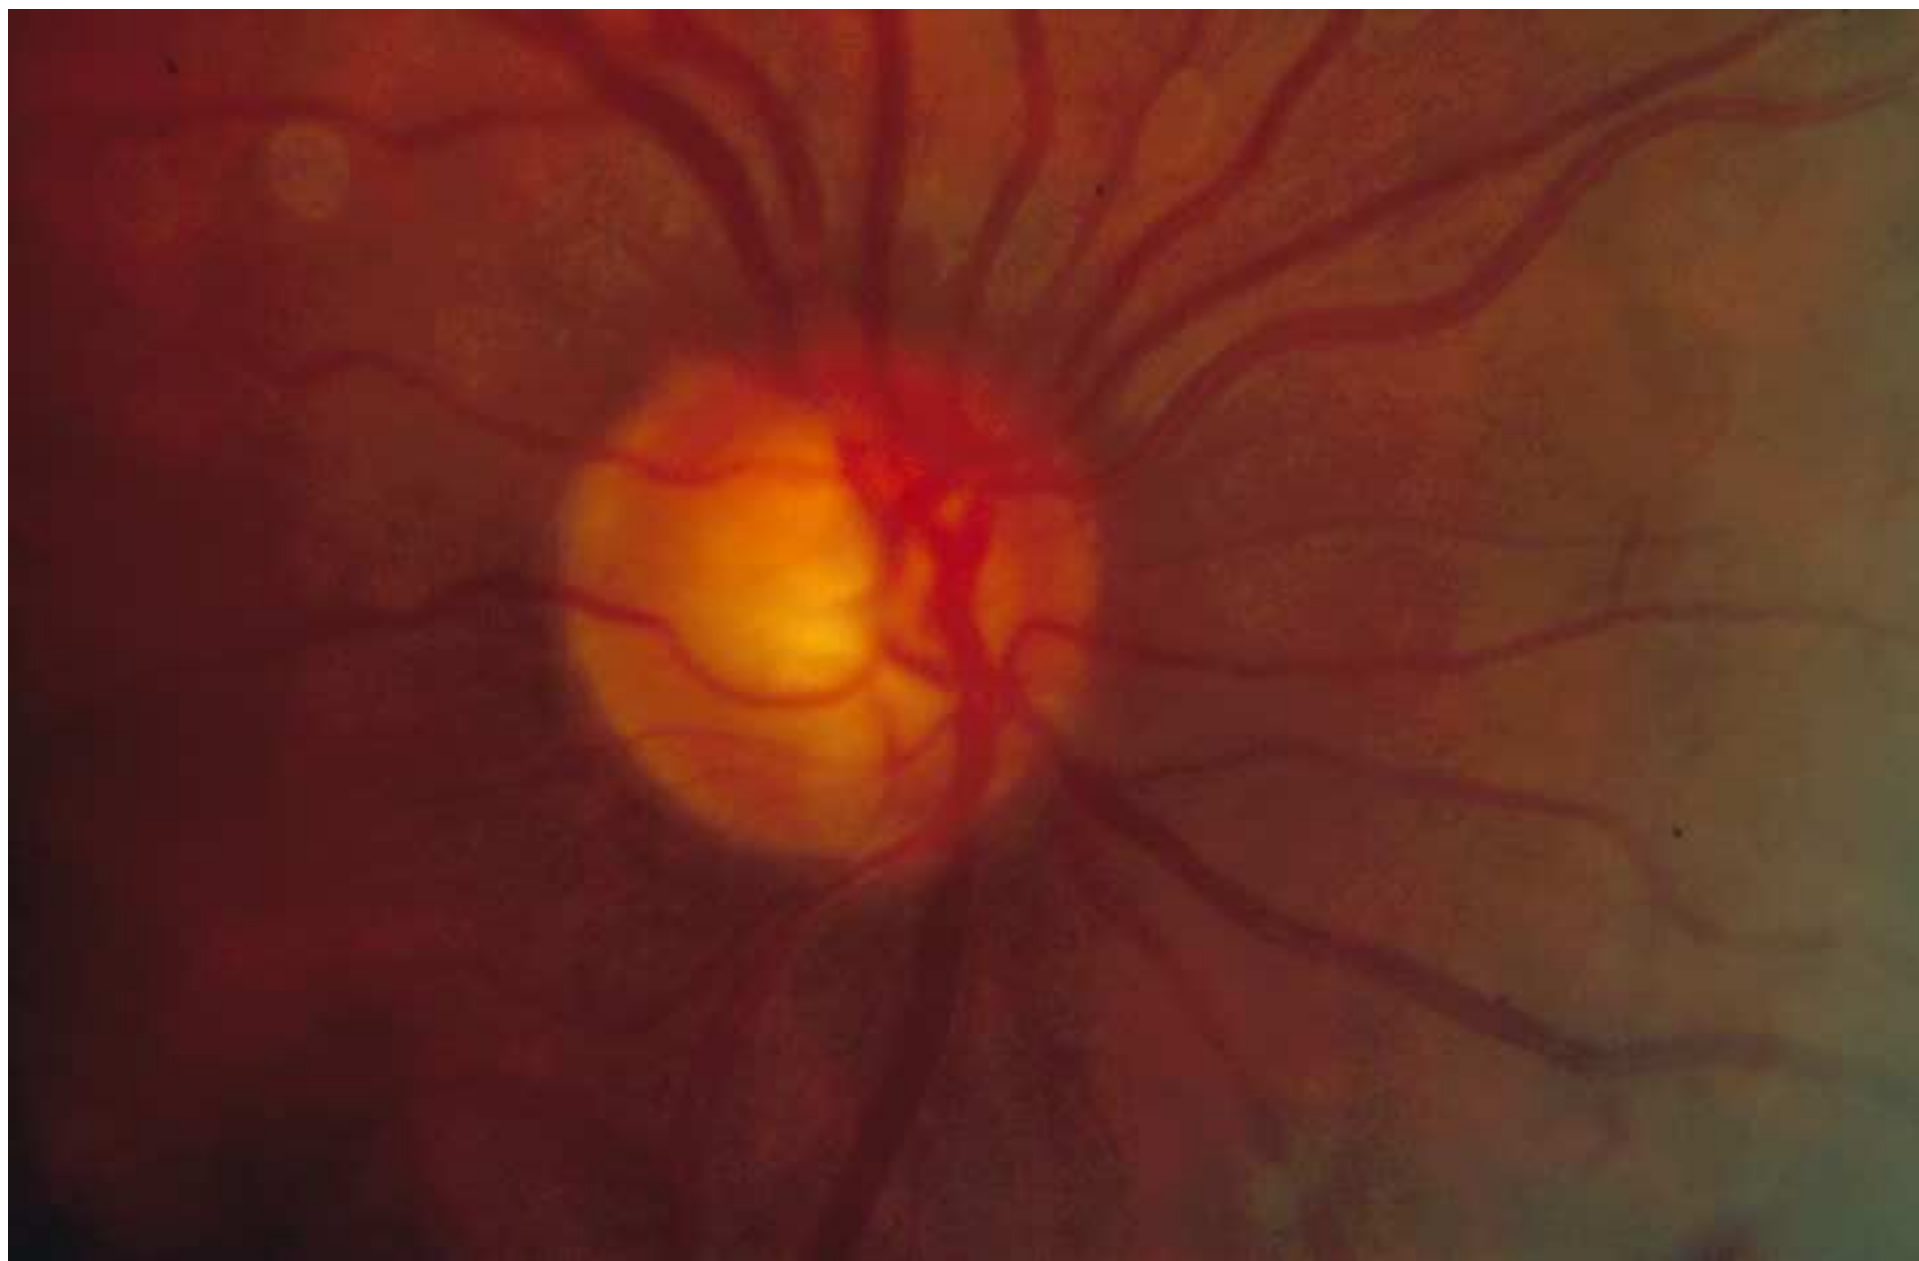

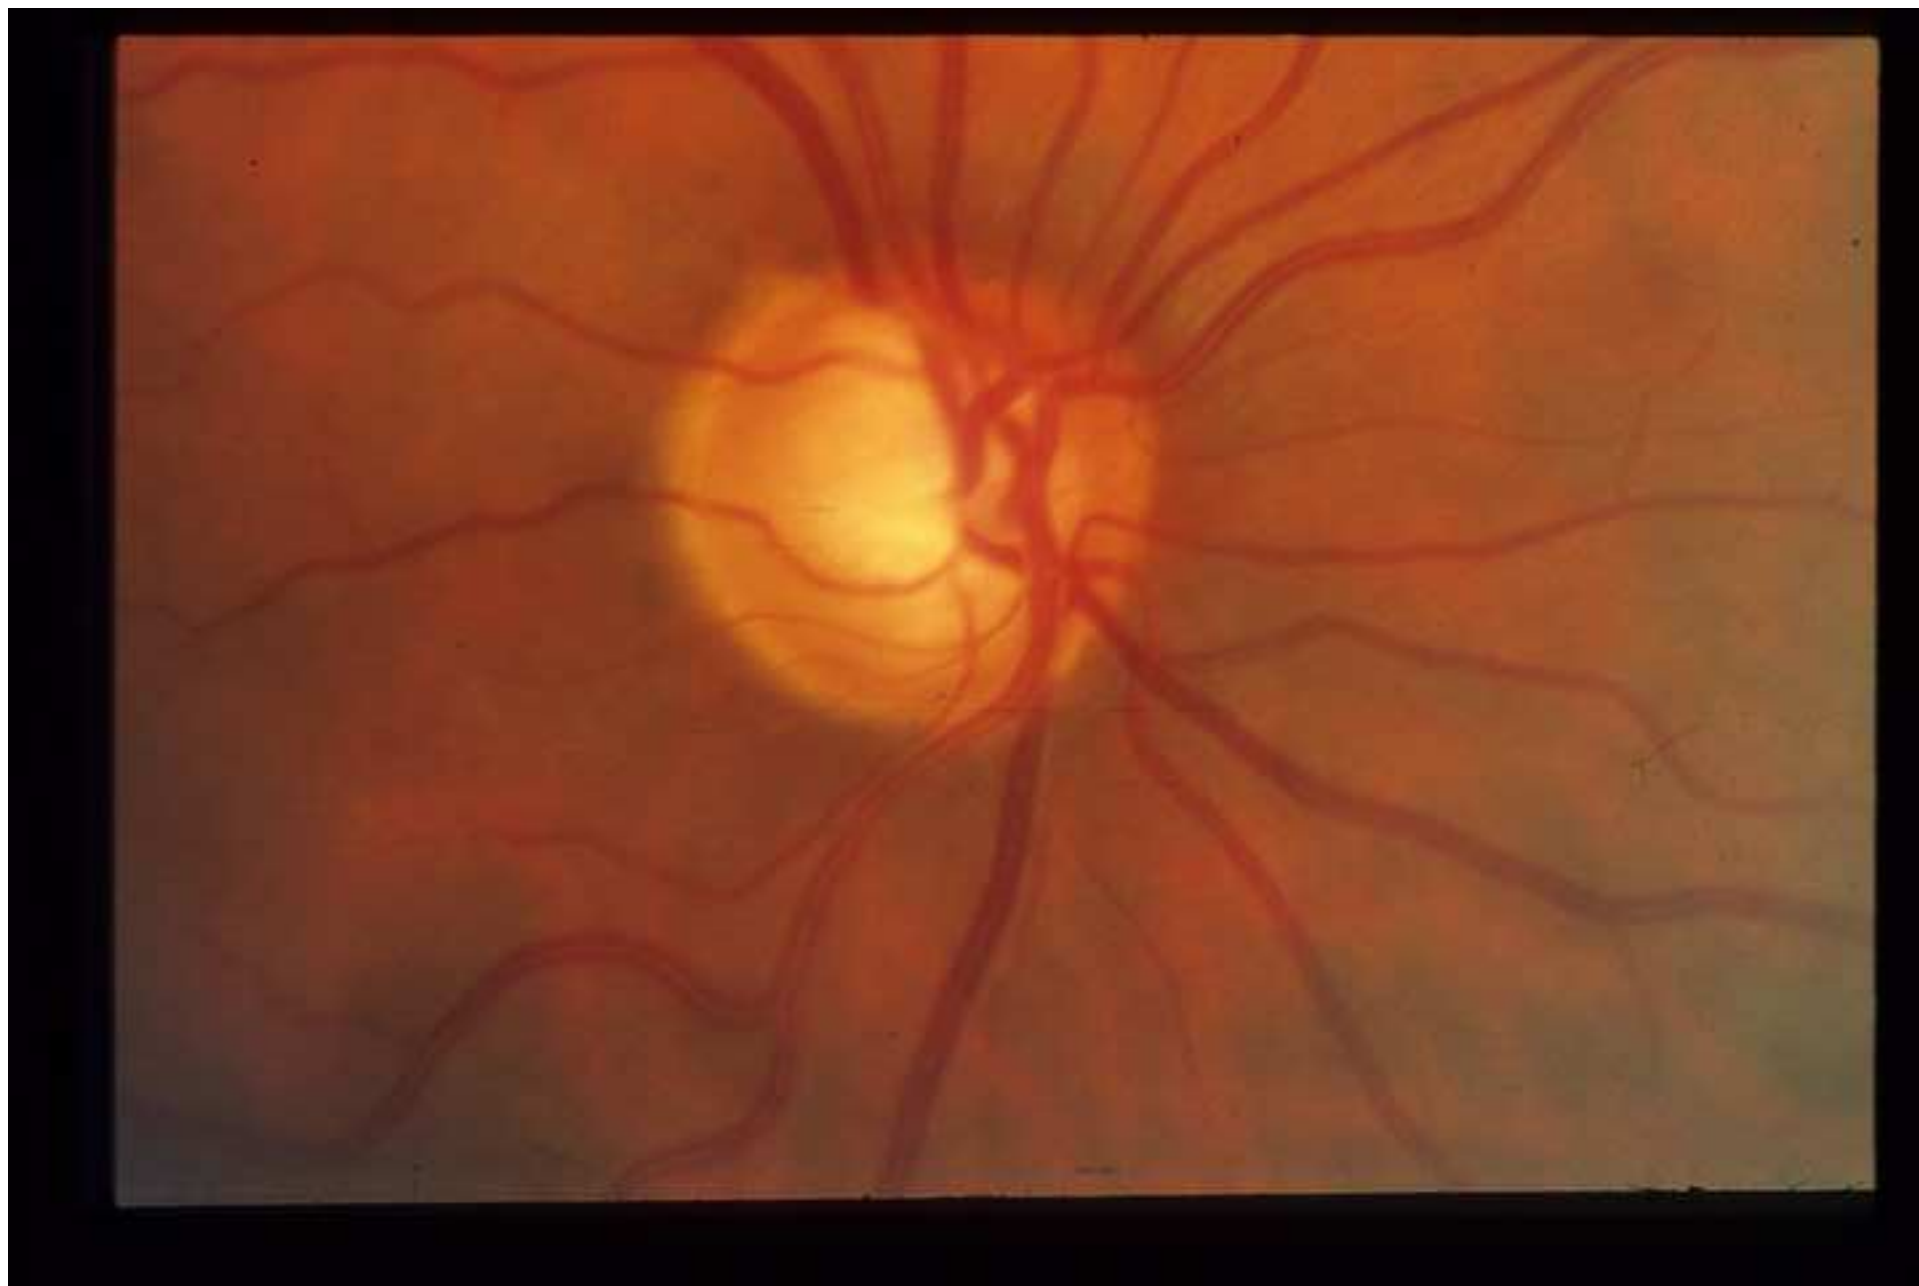

Supplement: NIHMS105753-supplement-supplement_1.pdf [file NIHMS105753-supplement-supplement_1.pdf]
